# Supplementary material for: Mitochondrial Dysfunctions Contribute to Hypertrophic Cardiomyopathy in Patient iPSC-Derived Cardiomyocytes with MT-RNR2 Mutation
Source: PubMed Central journal article supplement — Stem Cell Reports. 2018 Feb 15;10(3):808–21. doi: 10.1016/j.stemcr.2018.01.013 (PMC5918198; doi:10.1016/j.stemcr.2018.01.013), 2018-02-15
Supplement: mmc1.pdf [file mmc1.pdf]

**Supplemental Information**

**Mitochondrial Dysfunctions Contribute to Hypertrophic Cardiomyopathy in Patient iPSC-Derived Cardiomyocytes with *MT-RNR2* Mutation**

**Shishi Li, Huaye Pan, Chao Tan, Yaping Sun, Yanrui Song, Xuan Zhang, Wei Yang, Xuexiang Wang, Dan Li, Yu Dai, Qiang Ma, Chenming Xu, Xufen Zhu, Lijun Kang, Yong Fu, Xuejun Xu, Jing Shu, Naiming Zhou, Feng Han, Dajiang Qin, Wendong Huang, Zhong Liu, and Qingfeng Yan**

## SUPPLEMENTAL FIGURE LEGENDS

### **Figure S1. Generation and characterization of induced pluripotent stem cells. (A)**

Phase contrast photographs of H1 embryonic stem cells (ESCs), iPSCs derived from control participants (Con-iPSCs), and iPSCs derived from HCM patients (HCM-iPSCs), all grown on feeder layers. iPSCs at passage 10 or more are shown. Scale bar, 100  $\mu\text{m}$ . The same cell lines were stained for alkaline phosphatase (AP). Scale bar, 100  $\mu\text{m}$ . Immunofluorescence analysis for the presence of the pluripotency markers (TRA-1-60, TRA-1-81, Nanog, SSEA-3 and SSEA-4) are indicated; nuclei are stained in blue with DAPI. Scale bar, 50  $\mu\text{m}$ . See also Figures S2A-S2E. (B) Quantitative PCR was performed to detect the expression of endogenous pluripotent genes and marker genes in three germ layers from *in vitro* HCM-iPSC embryoid bodies (HCM-iPSC-EBs) and Ctrl-iPSC-EBs. H1 ESCs were used as a control. Values refer to the respective undifferentiated pluripotent colonies. *OCT4* and *NANOG* were used as markers of pluripotency, whereas *AFP*, *GATA4*, and *SOX17* (endoderm), *TBX1* (mesoderm), and *PAX6* and *SOX1* (ectoderm) were used as markers of differentiation. (C) Teratoma produced by HCM-iPSCs and Con-iPSCs showing derivatives of ectoderm (pigmented epithelium), mesoderm (smooth muscle) and endoderm (gut epithelium). Scale bar, 20  $\mu\text{m}$ .

### **Figure S2. Generation and characterization of induced pluripotent stem cells. (A)**

The expression of endogenous pluripotent genes of iPSCs. UCs are negative controls and H1 is positive control. (B) The silencing of exogenous transgenes of

iPSCs. UCs are negative controls and H1 is positive control. (C) Integration of the exogenous transgenes by semi-quantitative PCR. (D) The methylation of promoter regions in the *Oct4* and *Nanog* genes of iPSCs by bisulfite sequencing analysis. UCs are negative controls and H1 is positive control. (E) Karyotype analysis of HCM-iPSCs and Ctrl-iPSCs.

**Figure S3. Identification of m.2336T>C mutation in the *MT-RNR2* gene.** Partial sequence chromatograms of the 16S rRNA gene from Con-UCs (A), Con-iPSCs (B), HCM-UCs (C) and HCM-iPSCs (D), respectively. The arrows indicate the location of the base change at position 2336.

**Figure S4. Representative immunostaining and quantification analyses of MLC2v and MLC2a.** (A) Representative immunostaining for MLC2v and MLC2a in HCM-iPSC-CMs and Con-iPSC-CMs. Nuclei are stained in blue with DAPI. (B) Quantification of single and double positive cells in HCM-iPSC-CMs (n=41) compared to Con-iPSC-CMs (n=65). Data represent three control individuals (3 clones) and one patient (3 clones) with three independent experiments. The n is the total replicates of each Group. Data are represented as mean  $\pm$  SEM.

**Figure S5. Western blotting and quantification analyses of mitochondrial calcium uniporter (MCU).** VDAC is shown as a loading control. Data represent three control individuals (3 clones) and one patient (3 clones) with three independent experiments. Data are represented as mean  $\pm$  SEM. \*\*\* $P < 0.001$ .

**Figure S6. Steady-state level of SR  $\text{Ca}^{2+}$  transport marker proteins.** (A) Western blotting and quantification analysis of SERCA, NCX, PLB, PLB-p.  $\beta$ -ACTIN is

shown as a loading control. (B) The PLB-p/PLB ratio in Con-iPSC-CMs and HCM-iPSC-CMs. Data represent three control individuals (3 clones) and one patient (3 clones) with three independent experiments. Data are represented as mean  $\pm$  SEM. \* $P$ <0.05.

**Figure S7. Properties of K<sup>+</sup> current ( $I_K$ ) in HCM-iPSC-CMs.** (A) Representative traces for  $I_K$  current using whole cell patch-clamp from HCM-iPSC-CMs (n=28) and Con-iPSC-CMs (n=30). (B) Current-voltage (I-V) relationship of  $I_K$  was determined from -60 to +60 mV in 10 mV increments from HCM-iPSC-CMs (n=28) and Con-iPSC-CMs (n=30). (C) Mean peak of  $I_K$  in HCM-iPSC-CMs (n=28) and Con-iPSC-CMs (n=30). (D)  $I_K$  density-voltage relationship was determined from -60 to +60 mV in 10 mV increments from HCM-iPSC-CMs (n=28) and Con-iPSC-CMs (n=30). (E) Peak  $I_K$  density in HCM-iPSC-CMs (n=28) and Con-iPSC-CMs (n=30). Data represent three control individuals (3 clones) and one patient (3 clones) with three independent experiments. The n is the total replicates of each Group. Data are represented as mean  $\pm$  SEM. \* $P$ <0.05, \*\* $P$ <0.01, \*\*\* $P$ <0.001.

## **EXPERIMENTAL PROCEDURES**

### **Ethical Statement**

The clinical evaluations and urine cells (epithelial-like cells detached from tubules) were obtained from HCM family members under informed consent and using procedures approved by the Ethics Committee of the First Affiliated Hospital, Zhejiang University School of Medicine, China.

### **Generation of HCM-iPSCs**

The clinical evaluations and urine cells (epithelial-like cells detached from tubules) were obtained from HCM family members under informed consent and using procedures approved by the Ethics Committee of the First Affiliated Hospital, Zhejiang University School of Medicine, China. The generation and characterization of patient-specific induced pluripotent stem cells (iPSCs) from urine samples were performed as previously reported (Zhou et al., 2012; Zhang et al., 2016). Urine cells were cultured in REBM (Renal Epithelial Basal Medium, Lonza) medium containing SingleQuot Kit CC-4127 supplements (Lonza). pMX-based retroviruses (Addgene) with the reprogramming factors Oct-4, Sox-2, Klf-4, and c-Myc were infected into  $5-10 \times 10^4$  cells in a 6-well culture dish. After 3 or 4 days of transfection,  $5 \times 10^4$  cells were split onto a layer of feeder cells using half human embryonic stem cell (ESC) medium with 10 ng/mL basic fibroblast growth factors (Invitrogen) and half dFBS medium [(DMEM high glucose medium (Invitrogen) with 20% human defined fetal bovine serum (Hyclone)]. On day 5, 50  $\mu\text{g/ml}$  Vitamin C (Sigma) and 1 mmol/L valproic acid (Merck)

were added; Vitamin C was maintained in the medium but valproic acid was removed on day 12. The medium was replaced with mTesR1 medium (StemCell) on day 12 to the end of the experiment. Colonies with an ESC-like appearance were picked up and expanded on feeders or mTesR1 medium with Matrigel (BD Biosciences). We defined this stage as passage one.

### **iPSCs characterization**

Characterization of iPSCs, such as alkaline phosphatase (AP) staining, expression of endogenous pluripotent genes, silencing of exogenous transgenes, transgene integration, immunocytochemistry, karyotyping and DNA methylation, were performed as previously reported (Zhang et al., 2016). DNA was extracted using a DNeasy Tissue kit (Qiagen), and total RNA was extracted using Trizol (Invitrogen). Quantitative real-time PCR (qPCR) was performed using an ABI PRISM 7900HT Sequence Detection System (Applied Biosystems) and SYBR Premix EX Taq<sup>TM</sup> (Takara). The samples were analyzed in triplicate and  $\beta$ -actin values were used for normalization. Bisulfite sequencing technology was used to detect the methylation pattern of the promoter region of *Oct4* and *Nanog*. Immunofluorescence staining confirmed the expression of pluripotency markers in these iPSCs. Primary antibodies included Nanog (1:200, R&D), SSEA-3 (1:400, Developmental Studies Hybridoma Bank), SSEA-4 (1:100, Abcam), TRA-1-60 (1:100, Millipore), and TRA-1-81 (1:100, Millipore). The secondary antibodies included Alexa Fluor 488 goat anti-mouse IgM, Alexa Fluor 594 goat anti-rat IgM, Alexa Fluor 594 donkey anti-mouse IgG, and Alexa Fluor 594 donkey anti-

goat IgG (all from Invitrogen). A laser scanning confocal microscope LSM710 (Zeiss) was used to capture immunofluorescence staining images.

### ***In vitro and in vivo differentiation***

To determine the differentiation ability of human iPSCs *in vitro*, we used floating cultivation to form embryoid bodies (EBs), as previously reported (Zhang et al., 2016). iPSCs on feeders were treated with dispase (Invitrogen) and then collected by scraping. After centrifugation, cell pellets were re-suspended in human ESC medium without bFGF and grown for 8 days in non-adherent dishes. The formed EBs were then transferred to Matrigel-coated dishes to allow differentiation for another 8 days before RNA extraction. To test iPSC pluripotency *in vivo*, we injected  $2 \times 10^6$  iPSCs subcutaneously or intramuscularly into immunocompromised non-obese diabetic-severe combined immunodeficient mice (NOD-SCID) using procedures approved by the experimental animal welfare ethics committee of Zhejiang University, China. The tumors were sectioned after 8-10 weeks, fixed with PBS containing 4% paraformaldehyde and stained with hematoxylin/eosin (Zhang et al., 2016).

### **Differentiation of iPSCs into cardiomyocytes**

Established iPSC lines from HCM patients and the control group were differentiated into cardiomyocyte lineages (iPSC-CMs) using monolayer differentiation protocols as described previously (Lian et al., 2012). iPSCs were seeded onto a Matrigel-coated cell-culture dish at  $1-2 \times 10^5$  cells/cm<sup>2</sup> in mTeSR1 supplemented with 5 μmol/L ROCK

inhibitor (Y-27632, Sigma) (day-5) for 24h. Then, the cells were cultured in mTeSR1 medium, which was changed daily (day-4~day-1). At day 0, the cells were treated with CHIR99021 (12 $\mu$ mol/L, Selleck) in RPMI1640/B27-insulin for 24h. The medium was then changed to RPMI1640/B27-insulin (day1). IWP2 (5 $\mu$ mol/L, Tocris) was added at day 3 and then removed during the medium change on day 5. The cells were maintained in RPMI1640/B27 starting on day 7, and were subcultured every 3 days. The mature beating CMs were picked up, dissociated and seeded on coverslips for functional assays, such as calcium imaging, patch-clamp, immunostaining and more.

### **Measurement of cell size**

Cell size measurements were performed as previously described (Parra et al., 2014). Cells were cultured on coverslips for 72 h, incubated for 1 h with Mitotracker Red (200 nmol/L) and maintained in RPMI 1640 medium. Then cells were fixed with RPMI 1640 medium containing 4% paraformaldehyde for 15 min, and 0.4% Triton X-100 for permeabilization for 15min. Nonspecific sites were blocked with 5% skimmed milk in PBS for 1 h and then the cells were incubated with anti-TNNI3 at 4°C overnight. The secondary antibody was Alexa-Fluor-488-conjugated anti-mouse-IgG. Confocal image stacks were captured with a Zeiss LSM710 laser scanning confocal microscope and the analysis software was Zen2011. Cell size was analyzed using the Image J-3D Object counter plug-in. Each experiment was performed at least three times and 30-50 cells per condition were quantified.



### **ATP/ADP measurements**

The ATP/ADP level in cells was measured using bioluminescent detection (ADP/ATP Ratio Assay Kit, Abcam) according to the manufacturer's instructions. The cells were plated in 96well microplates (Corning) with RPMI1640 medium containing 20% FBS for 72 hrs. The bioluminescent intensities were measured on multi-mode microplate reader (Synergy H1 Hybrid, BioTek). The ATP test mixture (100 $\mu$ L/well) was added to obtain Data A. Next, 50 $\mu$ L/well of Nucleotide Releasing Buffer was added to release ATP and ADP and obtain Data B and Data C. Finally, Data D was determined by adding the ADP test mixture. The ATP/ADP ratio = (Data B-Data A) / (Data D-Data C). Each experiment was repeated at least three times.

### **Mitochondrial membrane potential assay**

The mitochondrial membrane potential was measured using fluorescence detection (JC-10, Abcam) according to the manufacturer's instructions. iPSC-CMs were cultured on 96-well black-walled clear-bottom plates for 48 hrs in mTeSR medium and RPMI1640 medium with 20% FBS, respectively. After the above cells were incubated with 100  $\mu$ L fresh medium for 30 min and dyed with 50  $\mu$ L JC-10 solution for 30min, the fluorescence intensities (Ex/Em=485/525nm and Ex/Em=540/590nm) were measured on multi-mode microplate reader (Synergy H1 Hybrid, BioTek). The ratio between monomeric (Em=590 nm) and aggregate (Em=525 nm) forms of JC-10 represents the change in the mitochondrial membrane potential. A high ratio indicates a high mitochondrial membrane potential.

### **Measurement of intracellular Ca<sup>2+</sup>**

The intracellular Ca<sup>2+</sup> concentrations were measured as described previously with slight modifications (Liao et al., 2016). iPSC-CMs were dissociated and loaded in a culture medium containing 5 μmol/L Fura-2 acetoxymethylester (Fura-2AM, Dojindo Laboratories) at 37°C for 30min and then washed to remove extracellular Fura-2AM. They were then resuspended in Hanks' balanced salt solution (140 mmol/L NaCl, 5 mmol/L KCl, 10 mmol/L HEPES, 1 mmol/L CaCl<sub>2</sub>, 1 mmol/L MgCl<sub>2</sub>, 1 mg/ml glucose, pH7.4) at a concentration of 3×10<sup>7</sup> cells/mL. The calcium flux was measured using excitation at 340 nm and 380 nm in a fluorescence spectrometer (LS55, PerkinElmer Life Sciences). Calibration was performed using 0.1% Triton X-100 for total fluorophore release and 10 mmol/L EGTA to chelate the free Ca<sup>2+</sup>. The intracellular Ca<sup>2+</sup> concentrations were calculated using a fluorescence spectrometer measurement program.

### **Calcium Imaging**

Calcium imaging were performed as described previously with slight modifications (Zou et al., 2017). iPSC-CMs were seeded on gelatin-coated glass coverslips for 2 days. Cells were dissociated and loaded with 5 μmol/L Fura-2 AM (Dojindo Laboratories) in bath solution containing 0.01% pluronic F127 for 30 min at room temperature, and washed 5 times with bath solution. Imaging was acquired in an Olympus microscope (BX51WI) with a 40 × objective lens on an Andor DL-604M EMCCD camera. Data

was collected using the Macro-manager software. Fura-2 was excited by a Lambda XL light source and fluorescent signals were collected at a rate of 1 Hz. The fluorescence ratio  $F(\lambda_{ex}340\text{ nm})/F(\lambda_{ex}380\text{ nm})$  was calculated and imaging data were analyzed using Imaging J. The bath solution contained: 140 mmol/L NaCl, 5 mmol/L KCl, 2 mmol/L MgCl<sub>2</sub>, 1.8 mmol/L CaCl<sub>2</sub>, 10 mmol/L HEPES, 10 mmol/L glucose.

### **Caffeine treatment of iPSC-CMs**

Cells were perfused with PBS containing 1.8 mmol/L Ca<sup>2+</sup> and 2 mmol/L Mg<sup>2+</sup> and paced at 1Hz to view regular transients. A pulse of 20 mmol/L stock caffeine solution was added after 1 minute recording.

### **Measurement of L-type Ca<sup>2+</sup> currents**

The L-type Ca<sup>2+</sup> currents ( $I_{CaL}$ ) were recorded using whole-cell patch-clamp (Axopatch-700A and MultiClamp 700B amplifier, Axon Instruments, Sunnyvale, CA), as previously described (Hamill et al., 1981). The pipette electrode (2.5-4.5 M $\Omega$ ) was filled with a solution containing 120 mmol/L CsCl, 5 mmol/L Na<sub>2</sub>-ATP, 5 mmol/L MgCl<sub>2</sub>, 10 mmol/L EGTA, and 5 mmol/L HEPES, pH 7.2. The external solution contained 140 mmol/L NaCl, 1 mmol/L MgCl<sub>2</sub>, 1.8 mmol/L CaCl<sub>2</sub>, 5 mmol/L CsCl and 10 mmol/L HEPES (pH 7.4).  $I_{CaL}$  was elicited by a single 200 ms voltage pulse to various test potentials from the holding potential of -40 mV at a frequency of 0.1Hz. The recordings were initiated 5 min after the patch break, to allow for equilibration of the patch pipette solution with the intracellular milieu. The current-voltage (I/V)

relationship of  $I_{CaL}$  was obtained by plotting the peak current amplitude in response to voltage pulses to potentials between -40 mV and +60 mV from the holding potential in 10 mV increments. The data was then analyzed with Lab Chart8 (AD Instruments).

### **Current-voltage (*I-V*) relationship of $I_{CaL}$**

The current-voltage (*I-V*) relationship of  $I_{CaL}$  was determined by applying test pulses (100 ms) from -60 to +50 mV in 10 mV increments at a frequency of 0.2 Hz. Prepulses from a holding potential of -80 to -40 mV (P, duration: 50 ms) along with TTX (10 mmol/L) were applied to inactivate  $Na^+$  currents. The prestep to -40 mV was also applied to inactivate the T-type  $Ca^{2+}$  current.

### **Measurement of $K^+$ currents**

For recording  $K^+$  currents the extracellular solution contained: 135 mmol/L N-methyl-D-glucamine (NMDG) chloride, 5 mmol/L KCl, 3.6 mmol/L  $CaCl_2$ , 1 mmol/L  $MgCl_2$ , 3 mmol/L  $NiCl_2$ , and 10 mmol/L HEPES, pH adjusted to 7.40 at 37°C with NMG. The intracellular solution contained: 50 mmol/L KCl, 80 mmol/L K-aspartate, 1 mmol/L  $MgCl_2$ , 3 mmol/L MgATP, 10 mmol/L EGTA, and 10 mmol/L HEPES, pH adjusted to 7.40 with NMDG. Depolarization-activated outward  $K^+$  currents were elicited by a family of 500 ms depolarizations from a -80 mV holding potential to voltages ranging from -60 to +60 mV (10 mV steps).

### **Steady-state activation and inactivation of $I_{CaL}$**

Steady-state activation was determined by stepping to various prepulse voltages (10 mV increments) levels from -60 to +20 mV for 100 ms from a holding potential of -80 mV before repolarizing to a fixed test pulse at -50 mV. Steady-state inactivation was determined by stepping to various prepulse voltages (-60 to +40 mV, 10 mV increments) for 5 s before depolarization to a fixed test potential of +10 mV for 100 ms to evoke channel opening. There was a 5 ms interpulse interval that enabled the resetting of the activation gate between the end of the prepulse and the beginning of the test pulse. Both steady-state activation and inactivation curves were fitted with a Boltzmann function ( $G = A_2 + (A_1 - A_2) / (1 + \exp((V_{1/2} - x)/k))$ ) that describes conductance (G) as a function of the potential (x).  $V_{1/2}$  is half-activating or half-inactivating potential, and k is the slope factor.

### **Action potential analysis**

For single-cell action potential analysis, the whole-cell patch clamp configuration (Axopatch-700A and MultiClamp 700B amplifier, Axon Instruments, Sunnyvale, CA) (Hamill et al., 1981) was used. Cells were digested at 37°C for 30 min with 1 mg/ml collagenase B (Roche) and seeded for 2 days on gelatin-coated glass coverslips. For action potential recording, patch pipettes (3-5 M $\Omega$ ) were filled with solutions containing 10 mmol/L HEPES, 120 mmol/L KCl, 1 mmol/L MgCl<sub>2</sub>, 3 mmol/L Mg-ATP and 10 mmol/L EGTA, (pH 7.3), and a bath solution containing 10 mmol/L HEPES, 140 mmol/L NaCl, 5.4 mmol/L KCl, 1.8 mmol/L CaCl<sub>2</sub>, 10 mmol/L glucose, and 1 mmol/L MgCl<sub>2</sub> (pH 7.4). The MultiClamp 700B Amplifier, Digidata 1440A analog-to-digital

converter and pClamp10.2 software (Axon Instruments/ Molecular Devices) were used for data amplification, acquisition and analysis.

### **Western blot analysis**

Twenty micrograms of proteins obtained from iPSCs and iPSC-CMs were denatured and loaded on 12% SDS-PAGE (sodium dodecyl sulfate polyacrylamide gels). Afterward, the proteins were electro-transferred to polyvinylidene difluoride (PVDF) membrane and subjected to Western blotting. Membranes were blocked in Tris-Buffered Saline and Tween20 (TBST) (150 mmol/L NaCl, 10 mmol/L Tris-HCl, pH 7.5 and 0.1% (v/v) Tween 20) containing 5% (w/v) milk, then incubated with the corresponding primary and secondary antibodies. The primary antibodies used for this experiment were the ND5 (1:1000, Abcam), COII (1:2000, Abcam), CYTB (1:1000, Sigma), ATP8 (1:200, Santa Cruz), ANF (1:2000, Abcam), BNP (1:2000, Abcam), TNNI3 (1:2000, Abcam),  $\alpha$ -ACTIN (1:500, Immunoway), MLC2v (1:1000, Abcam), MLV2a (1:500, Proteintech), RyR (1:1000, Abcam), PLB (1: 1000, Abcam), PLB-p (1:500, Abcam), SERCA2 (1:500, Abcam), MCU (1:1000, Abcam), NCX (1:1000, Abcam),  $\beta$ -ACTIN (1:1000, Proteintech) and VDAC (1:1000, Abcam). Peroxidase Affini Puregoatanti-mouse IgG and goatanti-rabbit IgG (Jackson) were used as a secondary antibody and protein signals were detected using the CLINX chemiscope and ECL system (CWBIO).

### **Quantitative real-time PCR**

Total RNA preparations were obtained by using Trizol reagent (Invitrogen) from  $1 \times 10^7$  cells as described elsewhere. One microgram of total RNA was reverse transcribed to cDNA using PrimeScript RT reagent Kit (Takara). The reaction system was the followed SYBR Premix EX Taq™ (Takara) instructions. The forward and reverse primers for PCR amplification are shown in supplemental table 1. *GAPDH* or *VDAC* served as an endogenous control. The quantitative real-time PCR was performed on an ABI PRISM 7900HT Sequence Detection System (Applied Biosystems). The relative amount of mRNA to endogenous control was calculated using the Ct cycle method as following formula:  $\Delta\Delta Ct = [Ct(\text{target gene}) - Ct(\text{control gene})]_{\text{target cell}} - [Ct(\text{target gene}) - Ct(\text{control gene})]_{\text{reference cell}}$ .

### **Quantification of mtDNA copy number**

The mtDNA copy number was quantified as described previously (Venegas et al., 2012). A 1241bp section of the human  $\beta$ -globin gene and a 1724bp sequence of mtDNA located within the 16S rRNA gene was inserted into the cleaved blunt-ended *Hind* III and *Ava* I restriction sites of the pCR plasmid, respectively. The resultant plasmid pCR II (6073bp) was verified as having only one copy of each insert by restriction enzyme digestion and DNA sequencing. The relative mtDNA copy numbers were measured by quantitative real-time PCR and corrected by measurement of the nuclear DNA. The primers for the *MT-RNR2* gene were 5'-GCACACCCGTCTATGTAGCAA -3' and 5'-GATTTAGAGGGTTCTGTGGGCA-3'. The primers for the nuclear  $\beta$ -globin gene were 5'-

AGAAACTGGGCATGTGGAGACA-3' and 5'-ATGAGCCTTCACCTTAGGGTTG-3'. The quantitative real-time PCR was performed using an ABI PRISM 7900HT Sequence Detection System (Applied Biosystems) and SYBR Premix EX Taq™ (Takara). Sample mtDNA content (mtDNA copies per cell) were calculated using the following formula:

$$\text{mtDNA copies per cell} = (\text{MT-RNR2 gene copies}/\beta\text{-globin gene copies}) \times 2$$

### **Mutational analysis of mitochondrial genome**

Genomic DNA was isolated from the iPSCs of HCM patients and healthy unrelated individuals using DNeasy Tissue kit (Qiagen). The entire mtDNA were PCR amplified in 24 overlapping fragments by use of sets of the light-strand and heavy-strand oligonucleotide primers, as described previously (Liu et al., 2014). Each fragment was purified and subsequently analyzed by direct sequencing in an ABI 3730xl automated DNA sequencer using the Big Dye Terminator Cycle sequencing reaction kit. The resultant sequence data was compared with the revised Cambridge reference sequence (GenBank accession No. NC\_001807) (Andrews et al., 1999). The published data on <http://www.mtodb.igp.uu.se/> was used to determine the allelic frequency of the identified variants.

### **Statistical analysis**

Statistical analysis was carried out using the Student's unpaired, two-tailed t-test contained in the Microsoft-Excel program. In Figure Legends, all data represent three



control individuals (3 clones) and one patient (3 clones) with at least three independent experiments. Several replicates for each clone were performed in every independent experiment. The n is the total replicates of each Group. Data are represented as mean  $\pm$  SEM. \* $P$ <0.05, \*\* $P$ <0.01, \*\*\* $P$ <0.001.

### **Supplemental References**

Andrews RM, Kubacka I, Chinnery PF, Lightowlers RN, Turnbull DM, Howell N.

(1999). Reanalysis and revision of the Cambridge reference sequence for human mitochondrial DNA. *Nat Genet.* 23:147.

Venegas V and Halberg MC. (2012). Measurement of mitochondrial DNA copy number.

*Methods Mol Biol.* 837:327-35.

**Figure S1.**

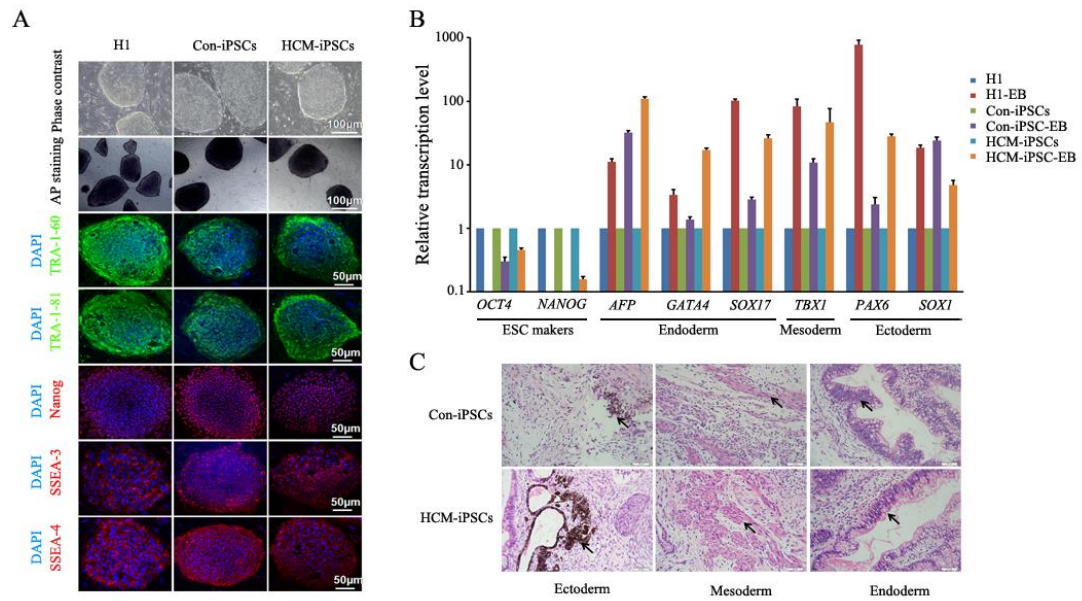

**Figure S2.**

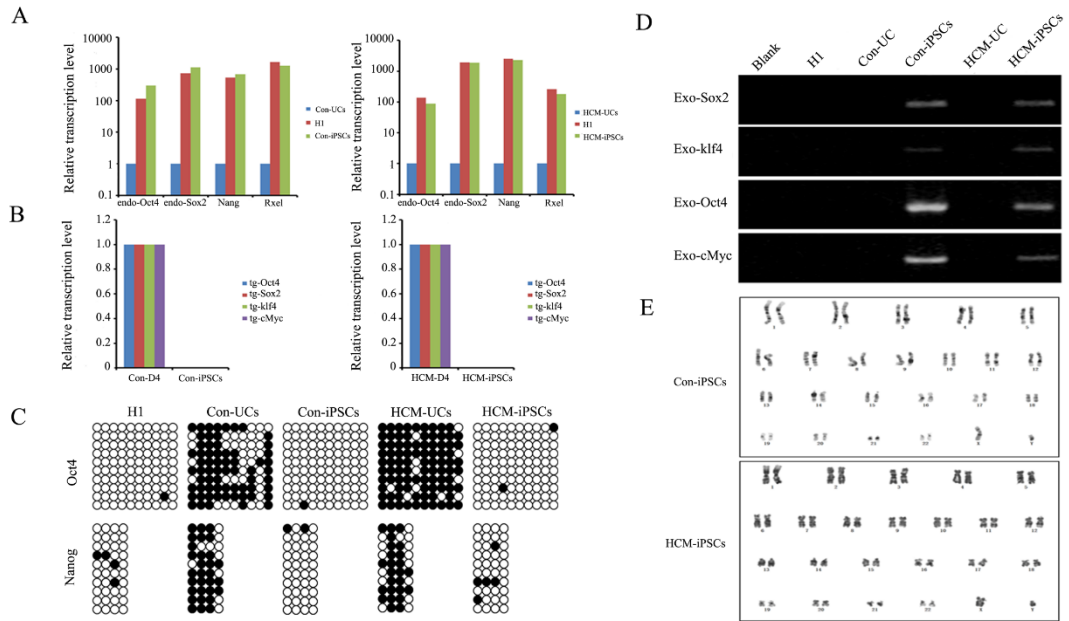

**Figure S3.**

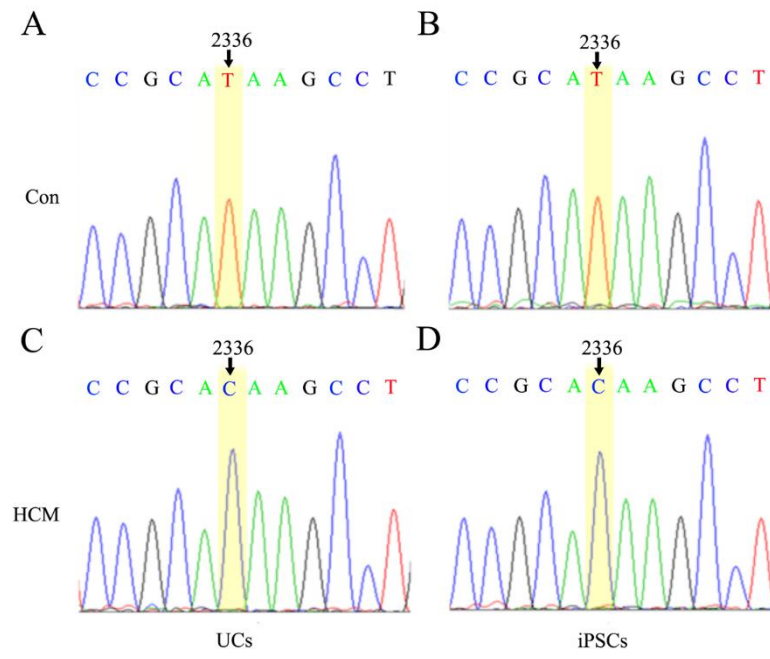

**Figure S4.**

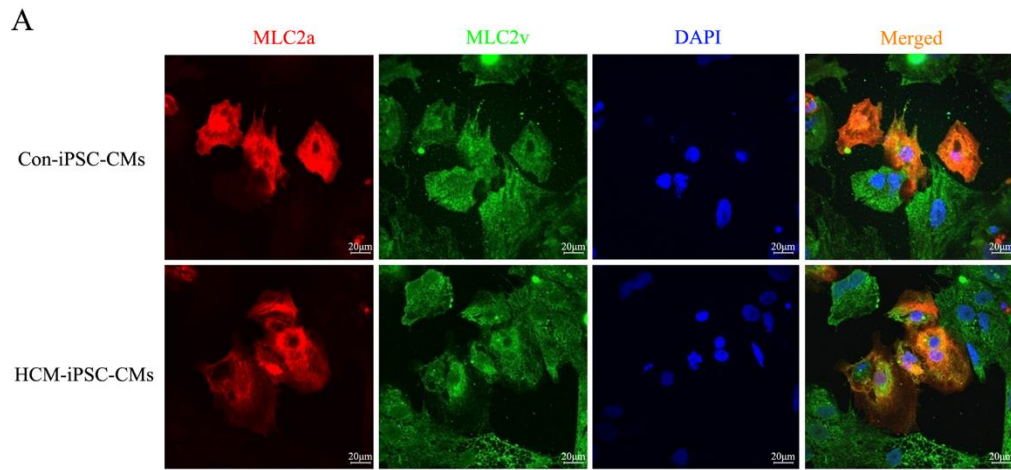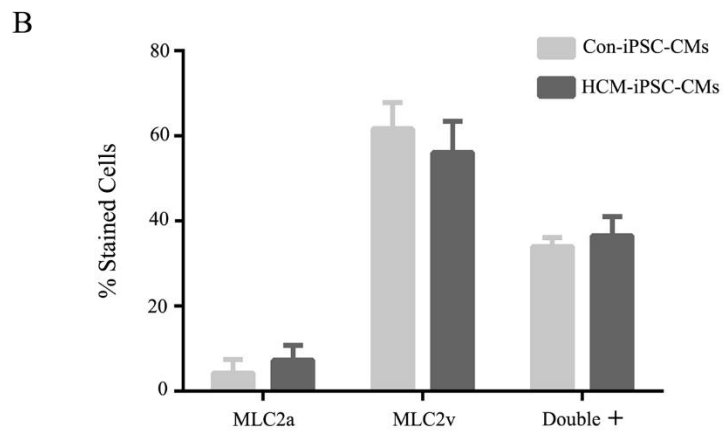

**Figure S5.**

**A**

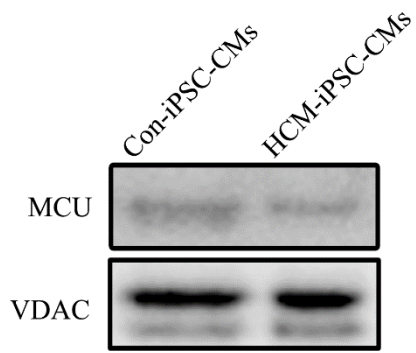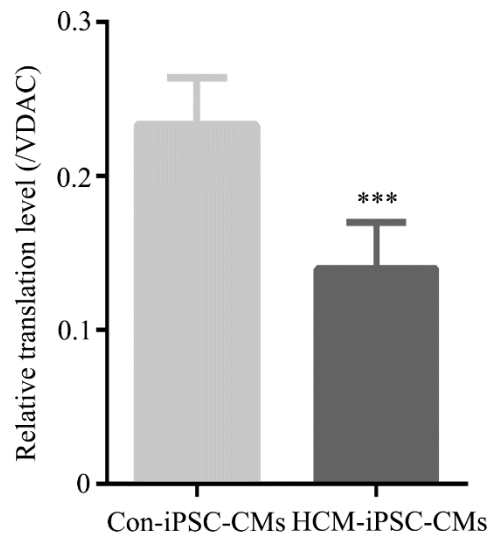

**Figure S6.**

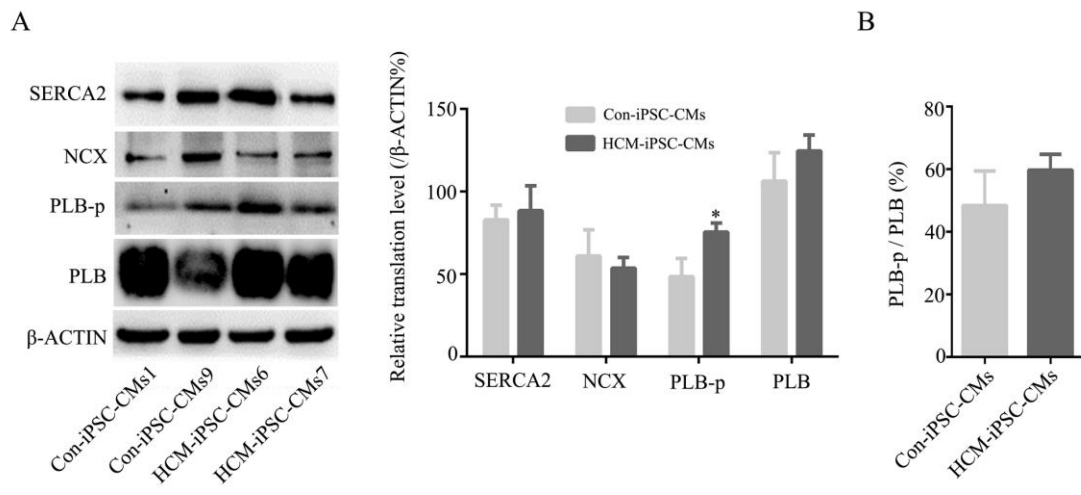



Figure S7.

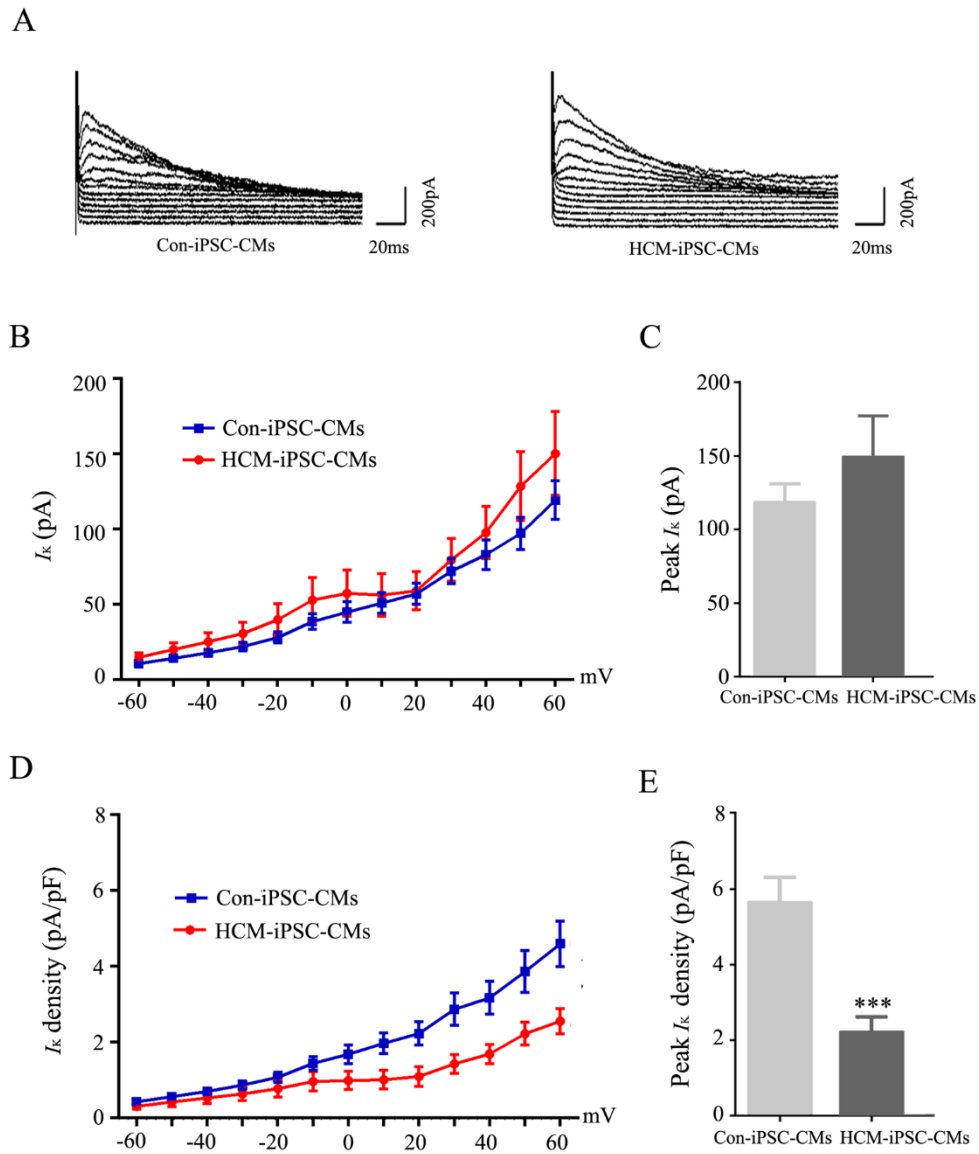

**Table S1.** Summary for clinical features of HCM family members

| Ground               | Family Member | Gender (M/F) | Age (years) | <i>MT-RNR2</i> Genotype | Symptoms | MLVWT (mm) | IVS/LPW |
|----------------------|---------------|--------------|-------------|-------------------------|----------|------------|---------|
| Maternal members     | II-1          | F            | 59          | m.2336T>C               | HCM      | 26.8       | 3.21    |
|                      | II-3          | M            | 49          | m.2336T>C               | HCM      | 38.7       | 2.93    |
|                      | III-1         | M            | 38          | m.2336T>C               | HCM      | 46.6       | 2.86    |
|                      | III-3         | M            | 32          | m.2336T>C               | HCM      | 37.4       | 3.99    |
| Non-maternal members | II-2          | M            | 57          | Wild type               | Normal   | 10.2       | 1.17    |
|                      | II-4          | F            | 48          | Wild type               | Normal   | 9.6        | 1.22    |
|                      | III-2         | F            | 30          | Wild type               | Normal   | 9.5        | 1.19    |
|                      | III-4         | F            | 31          | Wild type               | Normal   | 8.5        | 1.23    |
|                      | IV-1          | F            | 13          | Wild type               | Normal   | 8.2        | 1.28    |
|                      | IV-2          | M            | 8           | Wild type               | Normal   | 8.2        | 1.12    |

\* MLVWT, maximum left ventricular wall thickness; IVS, interventricular septum thickness;

LPW, left posterior wall thickness.

**Table S2.** mtDNA variants of UCs and iPSCs from HCM patient

| Gene                   | Position | HCM-UC          | HCM-iPSC7P10    | HCM-iPSC7P23    | HCM-iPSC7P33    |
|------------------------|----------|-----------------|-----------------|-----------------|-----------------|
| <i>D-loop</i>          | 16223    | C > T           | C > T           | C > T           | C > T           |
|                        | 16295    | C > T           | C > T           | C > T           | C > T           |
|                        | 16519    | T > C           | T > C           | T > C           | T > C           |
|                        | 73       | A > G           | A > G           | A > G           | A > G           |
|                        | 146      | T > C           | T > C           | T > C           | T > C           |
|                        | 199      | T > C           | T > C           | T > C           | T > C           |
|                        | 489      | T > C           | T > C           | T > C           | T > C           |
| <i>12S rRNA</i>        | 750      | A > G           | A > G           | A > G           | A > G           |
| <i>16S rRNA</i>        | 1438     | A > G           | A > G           | A > G           | A > G           |
|                        | 2336     | T > C           | T > C           | T > C           | T > C           |
|                        | 2706     | A > G           | A > G           | A > G           | A > G           |
| <i>ND1</i>             | 3882     | G > A (syn)     |
|                        | 4071     | C > T (syn)     |
| <i>ND2</i>             | 4769     | A > G (syn)     |
|                        | 4850     | C > T (syn)     |
|                        | 5442     | T > C (Phe-Leu) |
| <i>NC5(non-coding)</i> | 5894     | A>C             | A>C             | A>C             | A>C             |
| <i>CO1</i>             | 6455     | C > T (syn)     |
|                        | 7028     | C > T (syn)     |
| <i>ATP6</i>            | 8701     | A > G (Thr-Ala) |
|                        | 8860     | A > G (Thr-Ala) |
| <i>COIII</i>           | 9266     | G > A (syn)     |
|                        | 9540     | T > C (syn)     |
|                        | 9824     | T> C (syn)      | T> C (syn)      | T> C (syn)      | T> C (syn)      |
| <i>ND3</i>             | 10398    | A > G (Thr-Ala) |
|                        | 10400    | C > T (syn)     |
| <i>ND4</i>             | 10873    | T > C (syn)     |
|                        | 11665    | C > T (syn)     |
|                        | 11719    | G > A (syn)     |
|                        | 12091    | T > C (syn)     |
| <i>ND5</i>             | 12372    | G > A (syn)     |
|                        | 12705    | C > T (syn)     |
|                        | 12810    | A > G (syn)     |
|                        | 13759    | G > A (Ala-Thr) |
| <i>CYTB</i>            | 14766    | C > T (Thr-Ile) |
|                        | 14783    | T > C (syn)     |
|                        | 15043    | G > A (syn)     |
|                        | 15301    | G > A (syn)     |
|                        | 15326    | A > G (Thr-Ala) |
|                        | 15364    | C > T (syn)     |

**Table S3.** Steady-state activation and inactivation parameters of  $I_{CaL}$  recorded in Con-iPSC-CMs or HCM-iPSC-CMs

|              | Steady-state activation |         |    | Steady-state inactivation |         |    |
|--------------|-------------------------|---------|----|---------------------------|---------|----|
|              | $V_{1/2}$ (mV)          | k       | n  | $V_{1/2}$ (mV)            | k       | n  |
| Con-iPSC-CMs | -28.6±1.5               | 6.0±0.7 | 25 | -41.0±0.8                 | 5.8±0.2 | 25 |
| HCM-iPSC-CMs | -23.6±1.6*              | 7.3±0.5 | 23 | -40.1±0.6                 | 5.6±0.2 | 23 |

**Table S4.** Electrophysiological parameters of iPSC-CMs

|                     | Con-iPSC-CMs       | HCM-iPSC-CMs       | <i>p</i> -Value |
|---------------------|--------------------|--------------------|-----------------|
| Beating rate (BPM)  | 68.4±2.1           | 54.0±2.8           | 0.0062          |
| C <sub>m</sub> (pF) | 21.9±1.6 (n=39)    | 46.4±4.9 (n=34)    | 0.0005          |
| Tau (μs)            | 190.0±17.4 (n=39)  | 437.6±76.2 (n=34)  | 0.0008          |
| RMP (mV)            | -50.2±1.3 (n=40)   | -55.5±0.8 (n=43)   | 0.0806          |
| APA (mV)            | 90.2±1.4 (n=40)    | 92.7±2.5 (n=43)    | 0.3846          |
| Max dV/dt (mV/s)    | 12501±764.9 (n=40) | 11917±597.8 (n=43) | 0.5480          |
| APD30 (ms)          | 394.2±18.7 (n=40)  | 496.4±24.3 (n=43)  | 0.0012          |
| APD50 (ms)          | 484.5±19.6 (n=40)  | 577.7±30.1 (n=43)  | 0.0051          |
| APD90 (ms)          | 582.3±19.6 (n=40)  | 669.3±30.4 (n=43)  | 0.0084          |

C<sub>m</sub>, Cell electric capacitance; RMP, resting membrane potential; APA, action potential amplitude; Max dV/ds, maximal rate of depolarization; APD30, APD at 30% of repolarization; APD50, APD at 50% of repolarization; APD90, APD at 90% of repolarization. Values are the means±SEM.

**Table S5.** Information of antibodies in the study

| Antibody              | Antigen                                                           | Company     | Cat. No.   |
|-----------------------|-------------------------------------------------------------------|-------------|------------|
| Anti-ANF              | Atrial natriuretic factor                                         | Abcam       | ab191398   |
| Anti-BNP              | Brain natriuretic peptide                                         | Abcam       | ab92500    |
| Anti-TNNI3            | Troponin I type 3 cardiac                                         | Abcam       | ab52862    |
| Anti- $\alpha$ -ACTIN | alpha-cardiac muscle actin                                        | Immunoway   | YT5110     |
| Anti-MLC2v            | ventricular myosin light chain                                    | Abcam       | ab92721    |
| Anti-MLC2a            | atrial myosin light chain 2                                       | Proteintech | 17283-1-AP |
| Anti-NCX              | Na(+)/Ca(2+)-Exchange Protein                                     | Abcam       | ab177952   |
| Anti-RyR              | Ryanodine receptor                                                | Abcam       | ab2868     |
| Anti-PLB              | Phospholamban                                                     | Abcam       | ab2865     |
| Anti-PLB-p            | Phospholamban (phospho S16)<br>Sarcoplasmic/endoplasmic reticulum | Abcam       | ab15000    |
| Anti-SERCA2           | calcium ATPase 2                                                  | Abcam       | ab150435   |
| Anti-VDAC             | Voltage dependent anion channel                                   | Abcam       | ab14734    |
| Anti-MRPL19           | Mitochondrial ribosomal protein L19                               | Abcam       | ab218978   |
| Anti-MRPL23           | Mitochondrial ribosomal protein L23                               | Abcam       | ab174791   |
| Anti-MT-ND5           | Mitochondrial NADH dehydrogenase 5                                | Abcam       | ab92624    |
| Anti-MT-CYB           | Mitochondrial cytochrome b                                        | Abcam       | ab81215    |
| Anti-MT-COX2          | Mitochondrial cytochrome c oxidase 2                              | Abcam       | ab79393    |
| Anti-MT-ATP8          | Mitochondrial ATP synthase 8                                      | Santa Cruz  | SC-84231   |
| Anti-MCU              | Mitochondrial calcium uniporter                                   | Abcam       | ab45167    |
| Anti- $\beta$ -ACTIN  | Beta cytoskeletal actin                                           | Proteintech | 66009-1-Ig |

**Table S6.** Primers for quantitative PCR

| Gene            |         | Sequence (5'→3')           |
|-----------------|---------|----------------------------|
| <i>GAPDH</i>    | Forward | CAGGGCTGCTTTTAACTCTGGTA    |
|                 | Reverse | CATGGGTGGAATCATATTGGAAC    |
| <i>16S rRNA</i> | Forward | GCACACCCGTCTATGTAGCAA      |
|                 | Reverse | GATTTAGAGGGTTCTGTGGGCA     |
| <i>DN5</i>      | Forward | CGCTATGACATCGACATGACCAAGT  |
|                 | Reverse | ACCGATAACAAGTAGTCAGCCTGGAT |
| <i>CYTB</i>     | Forward | AGCAAACTCCACCTCCTATTCTTG   |
|                 | Reverse | GCTTACTGGTTGTCCTCCGATTCA   |
| <i>COX2</i>     | Forward | CCGCCATCATCCTAGTCCTCATC    |
|                 | Reverse | AGTTGAAGATTAGTCCGCCGTAGTC  |
| <i>ATP8</i>     | Forward | CTACCACCTACCTCCCTCACAAA    |
|                 | Reverse | GGGCAATGAATGAAGCGAACAGATT  |
| <i>MRPL19</i>   | Forward | CCAGGAGATTCAGGTGGTCAA      |
|                 | Reverse | GGACGTTCCCAGCGTTTAGA       |
| <i>MRPL23</i>   | Forward | GGTGCAGCATGGCTCTAACA       |
|                 | Reverse | GATCTGGGAACGTGAAGGTCT      |
| <i>RPLP0</i>    | Forward | GATGTGCAGCTGATCAAGACTG     |
|                 | Reverse | TATCAAGCACTTCAGGGTTGTAGAT  |
| <i>12S rRNA</i> | Forward | ATTCGTGGATTATCAATT         |
|                 | Reverse | GGATTAGATACCCTATTA         |
| <i>VDAC</i>     | Forward | GGTACAAGCGGGAGCACA         |
|                 | Reverse | TCTGGGTCACTCGGGATT         |
| <i>ACTB</i>     | Forward | CCCAGAGCAAGAGAGG           |
|                 | Reverse | GTCCAGACGCAGGATG           |
| <i>OCT4</i>     | Forward | CCTCACTTCACTGCACTGTA       |
|                 | Reverse | CAGGTTTTCTTCCCTAGCT        |
| <i>SOX2</i>     | Forward | CCCAGCAGACTTCACATGT        |
|                 | Reverse | CCTCCATTTCCCTCGTTTT        |
| <i>NANOG</i>    | Forward | TGAACCTCAGCTACAAACAG       |
|                 | Reverse | TGGTGGTAGGAAGAGTAAAG       |
| <i>REX1</i>     | Forward | TCGCTGAGCTGAAACAAATG       |
|                 | Reverse | CCCTTCTTGAAGGTTTACAC       |
| <i>Tg-OCT4</i>  | Forward | GGGTGGACCATCCTCTAGAC       |
|                 | Reverse | CCAGGTCCGAGGATCAAC         |
| <i>Tg-SOX2</i>  | Forward | GGGTGGACCATCCTCTAGAC       |
|                 | Reverse | GGGCTGTTTTTCTGGTTG         |
| <i>Tg-KLF4</i>  | Forward | GGGTGGACCATCCTCTAGAC       |
|                 | Reverse | GGAAGTCGCTTCATGTGG         |
| <i>Tg-C-MYC</i> | Forward | GGGTGGACCATCCTCTAGAC       |
|                 | Reverse | CCTCGTCGCAGTAGAAATAC       |

**Table S7.** Information of key reagents in the study

| Reagents                                    | Company    | Cat. No.    |
|---------------------------------------------|------------|-------------|
| pMX-h-Oct4                                  | Addgene    | 17217       |
| pMX-h-Sox2                                  | Addgene    | 17218       |
| pMX-h-Klf4                                  | Addgene    | 17219       |
| pMX-h-c-Myc                                 | Addgene    | 17220       |
| pMX-GFP                                     | Addgene    | 14567       |
| PCL-ECO                                     | Addgene    | 12371       |
| REGM™ Renal Epithelial Cell Growth Medium   | Lonza      | CC-3191     |
| REGM SingleQuot Kit Suppl. & Growth Factors | Lonza      | CC-4127     |
| Primocin                                    | Invivogen  | ant-pm-1    |
| DMEM/HG                                     | Gibco      | C11995500BT |
| DMEM/F12                                    | Gibco      | C11330500BT |
| FBS                                         | PAA        | A15-101     |
| Knockout serum replacement                  | Gibco      | 10828-028   |
| NEAA                                        | Gibco      | 11140-050   |
| GlutaMAX                                    | Gibco      | 35050-061   |
| 0.1% Gelatin                                | millipore  | ES-006-B    |
| MycAlert®Mycoplasma Detection Kit           | Lonza      | LT07-218    |
| 2-Mercaptoethanol                           | Gibco      | 21985-023   |
| bFGF                                        | Invitrogen | 13256-029   |
| Dispase                                     | Gibco      | 17105-041   |
| Collagenase IV                              | Gibco      | 17104-019   |
| Vc                                          | Sigma      | 49752-10G   |
| VPA                                         | CALBIOCHEM | 676380      |
| mTeSR1                                      | STEMCELL   | #05850      |
| Matrigel                                    | BD         | 354277      |
| REGM™ Renal Epithelial Cell Growth Medium   | Lonza      | CC-3191     |
| Knockout serum replacement                  | Gibco      | 10828-028   |
| B27-insulin                                 | Gibco      | A1895601    |
| B27                                         | Gibco      | 17504044    |
| CHIR99021                                   | Selleck    | CT99021     |
| IWP2                                        | Tocris     | 3533        |
| Y-27632                                     | Sigma      | Y0503       |
| Accutase                                    | STEMCELL   | #07920      |
| Collagenase B                               | Roche      | 11088815001 |
